# Supplementary material for: Panel‐based whole exome sequencing identifies novel mutations in microphthalmia and anophthalmia patients showing complex Mendelian inheritance patterns
Source: PubMed Central journal article supplement (PMC5702572; doi:10.1002/mgg3.329), 2017-08-21
Supplement: MGG3-5-709-s001.pdf [file MGG3-5-709-s001.pdf]

Supplementary Table S1. List of genes included in the MA panel

| Gene       | OMIM   | Chromosome |
|------------|--------|------------|
| ABCB6      | 605452 | chr2       |
| ALDH1A3    | 600463 | chr15      |
| ATOH7      | 609875 | chr10      |
| BCOR       | 300485 | chrX       |
| BMP4       | 112262 | chr14      |
| BMP7       | 112267 | chr20      |
| C12orf57   | 615140 | chr12      |
| CHD7       | 608892 | chr8       |
| COL4A1     | 120130 | chr13      |
| COX7B      | 300885 | chrX       |
| CRYBA4     | 123631 | chr22      |
| CRYGC      | 123680 | chr2       |
| FOXE3      | 601094 | chr1       |
| GDF3       | 606522 | chr12      |
| GDF6       | 601147 | chr8       |
| HCCS       | 300056 | chrX       |
| HESX1      | 601802 | chr3       |
| IKBKG      | 300248 | chrX       |
| MAB21L2    | 604357 | chr4       |
| MFRP       | 606227 | chr11      |
| NAA10      | 300013 | chrX       |
| NDUFB11    | 300403 | chrX       |
| NHS        | 300457 | chrX       |
| OTX2       | 600037 | chr14      |
| PAX6       | 607108 | chr11      |
| PORCN      | 300651 | chrX       |
| PRSS56     | 613858 | chr2       |
| PXDN       | 605158 | chr2       |
| RAB18      | 602207 | chr10      |
| RAB3GAP1   | 602536 | chr2       |
| RAB3GAP2   | 609275 | chr1       |
| RARB       | 180220 | chr3       |
| RAX        | 601881 | chr18      |
| RBP4       | 180250 | chr10      |
| SALL2      | 602219 | chr14      |
| SHH        | 600725 | chr7       |
| SIX6       | 606326 | chr14      |
| SMOC1      | 608488 | chr14      |
| SOX2       | 184429 | chr3       |
| STRA6      | 610745 | chr15      |
| TBC1D20    | 611663 | chr20      |
| TENM3/ODZ3 | 610083 | chr4       |
| TFAP2A     | 107580 | chr6       |
| TMEM98     | 615949 | chr17      |
| VAX1       | 604294 | chr10      |
| VSX2/CHX10 | 142993 | chr14      |
| YAP1       | 606608 | chr11      |
